# Supplementary material
Source: PubMed Central journal article supplement (PMC5406952)
Supplement: jcsm.13.5.737s1.pdf [file jcsm.13.5.737s1.pdf]

**Table S1—Key studies using patient-reported measures of narcolepsy.**

| <b>Scale</b>           | <b>Study Authors, Date<sup>a</sup></b> | <b>N</b> | <b>Population<sup>b</sup></b>                                                                                                             | <b>Study Objectives: Outcomes</b>                                                                                                                                                                                                                                                                                                               |
|------------------------|----------------------------------------|----------|-------------------------------------------------------------------------------------------------------------------------------------------|-------------------------------------------------------------------------------------------------------------------------------------------------------------------------------------------------------------------------------------------------------------------------------------------------------------------------------------------------|
| <b>CETQ</b>            | Moore WR, et al, 2007 <sup>46</sup>    | 356      | 78 patients with NC vs 78 controls with OSA; mean age (range): 53.5 (20-84) years (y); 58% women                                          | Pilot validation study: ESS sensitivity/specificity values were 0.94/0.99 and 0.90/0.99 for questions 1 and 2, and ranged from 0.74/0.99 to 0.87/0.94 for questions 2-5; PPV/NPV values ranged from 0.75/0.99 to 1.00/0.99 for all 5 questions                                                                                                  |
| <b>ESS<sup>c</sup></b> | Johns MW, 1991 <sup>36</sup>           | 180      | 150 adults with various sleep disorders including 13 with narcolepsy and 30 normal controls; mean ( $\pm$ SD) age: 46.6 (12) y; 61.5% men | Initial/introductory study: ESS scores were significantly higher (indicating ES) in participants with narcolepsy vs controls or primary snorers ( $P < 0.001$ for both); ESS was significantly correlated with nocturnal sleep latency ( $r = -0.379$ [n=138], $P < 0.001$ ) and daytime sleep latency (MSLT; $r = -0.514$ [n=27], $P < 0.01$ ) |
|                        | Johns MW, 2000 <sup>37</sup>           | 530      | Men and women with narcolepsy participating in 4 modafinil treatment trials (N=530), aged 17 to 68 y; sex percentages NR                  | To review and summarize data from large clinical trials of modafinil for narcolepsy symptoms: ESS sensitivity/specificity was 93.5/100.0 (cut-off > 10); ROC curves showed greater specificity of ESS over MSLT and MWT                                                                                                                         |
|                        | Parkes JD et al, 1998 <sup>38</sup>    | 371      | 188 patients with narcolepsy, 62 with hypersomnia, and 10 with OSA vs 188 normal controls; mean age (range): 54.3 (12-85) y; 51.9% women  | To use ESS for assessment of daytime sleepiness among other scales to develop a new measure for narcolepsy: ESS scores were 5 times higher in patients with narcolepsy vs controls (mean [SD] ESS score in narcolepsy patients: 19.6 [ $\pm$ 3.0], median [range]: 20 [9-24]); ESS sensitivity/specificity was 97%/100% (cutoff of 15)          |
|                        | Frauscher B et al, 2013 <sup>39</sup>  | 100      | Adults with narcolepsy, 87 with NC, 13 without cataplexy (N); median age (range): 39 (16-78) y; 56% men                                   | Chart review of consecutive patients: Median (range) ESS score was 18 (10-24); ESS scores tended to be higher in NC vs N patients                                                                                                                                                                                                               |

|             |                                          |     |                                                                                                                                                           |                                                                                                                                                                                                                                                                                                                                                                                                                                                 |
|-------------|------------------------------------------|-----|-----------------------------------------------------------------------------------------------------------------------------------------------------------|-------------------------------------------------------------------------------------------------------------------------------------------------------------------------------------------------------------------------------------------------------------------------------------------------------------------------------------------------------------------------------------------------------------------------------------------------|
|             | Kendzierska TB et al, 2014 <sup>40</sup> | NR  | Patients across 35 studies with a variety of sleep disorders and normal controls; mean/median age, sex percentages NR                                     | To summarize study data on psychometric properties of ESS via review of 35 published studies: Cronbach's alpha (internal consistency) ranged from 0.73-0.86; test-retest correlation was 0.82 in one good-quality study; pooled correlations for construct validity were moderate for MWT (-0.43) and weak for MSLT (-0.27); differences in scores between patients with narcolepsy and controls were clinically meaningful in multiple studies |
| <b>NSAQ</b> | Mamelak et al, 2004 <sup>d56</sup>       | 25  | Adults with NC (N=25); mean ( $\pm$ SD) age: 52.6 (8.8); 72.0% women                                                                                      | A pilot study to assess the effect of nocturnal, open-label sodium oxybate treatment for 10 weeks on sleep architecture in patients with NC: patients reported dose-related, subjective improvements in NSAQ measures including daytime sleepiness (76%), nighttime sleep quality (81%), ability to concentrate (67%), and overall condition (81%); other, objective measures used in the trial also showed improvements                        |
|             | Mamelak et al, 2015 <sup>d54</sup>       | 202 | Adults with NC (N=202) either naive to sodium oxybate or not previously titrated with it to clinical effect; mean ( $\pm$ SD) age: 41.9 (14.9); 65% women | To evaluate the efficacy of long-term (12- weeks) open-label treatment with sodium oxybate for reducing cataplexy attacks and improving excessive sleepiness using the NSAQ as the primary measure: percentages of patients reporting improvements in NSAQ items at Week 6 of treatment ranged from 87% (number cataplexy attacks) to 61% (number sleep paralysis episodes), and these improvements were maintained through Week 12             |
| <b>NSSQ</b> | Mitler MM et al, 1982 <sup>52</sup>      | 18  | 10 patients with narcolepsy and 8 normal controls matched for age; mean age; 43.8 y; 50% women                                                            | Initial use to determine effect of treatment for ES and correlation with MWT: significant differences post-treatment vs baseline were observed for all 7 items of scale, and sleep attacks, but not sleepiness; changes were consistent with improvements in MWT                                                                                                                                                                                |

|     |                                          |     |                                                                                                                                                                                 |                                                                                                                                                                                                                                                                                                                                                                                                                                                     |
|-----|------------------------------------------|-----|---------------------------------------------------------------------------------------------------------------------------------------------------------------------------------|-----------------------------------------------------------------------------------------------------------------------------------------------------------------------------------------------------------------------------------------------------------------------------------------------------------------------------------------------------------------------------------------------------------------------------------------------------|
|     | Rogers AE, 2001 <sup>53</sup>            | 29  | Adults with narcolepsy (with/without cataplexy) all being treated with stimulants and for cataplexy when present; mean (range) age: 43.7 (18-64) y (N=29); 58.6% women          | To compare treatment including scheduled sleep periods + stimulant medications vs stimulant medications alone: correlations of NSSQ with other ES measures were inconsistent; NSSQ baseline severity scores correlated highly with post-treatment improvements ( $P=0.006$ ); pretrial analyses also showed reliability of NSSQ items, sleepiness, sleep attacks, and cataplexy ( $r_s = 0.91, 0.83, \text{ and } 0.68$ , respectively).            |
| SNS | Sturzenegger C et al, 2004 <sup>15</sup> | 153 | 57 patients with definite NC (n=41) or narcolepsy with possible cataplexy (NpC; n=16), 56 patients with NNH, and 40 normal controls; median ( $\pm$ SD) age: 46 (18) y; 58% men | To evaluate clinical characteristics of narcolepsy, and assess a new narcolepsy scale, the SNS, in comparison with other, established scales (UNS, ESS): SNS scores were significantly different in all narcolepsy (NC + NpC) vs NNH patients ( $P < 0.001$ ), and between both NC and NpC vs NNH ( $P < 0.046$ for NpC vs NNH); SNS had sensitivity/specificity for narcolepsy of 96%/98% vs 98%/56% for the UNS.                                  |
|     | Sturzenegger C et al, 2006 <sup>49</sup> | 175 | 33 patients with NC, 142 with ES of other origins (e.g., SDB, IH); mean/median age, sex percentages NR                                                                          | To compare SNS sensitivity/specificity with that of UNS and ESS to diagnose narcolepsy and identify hypocretin-1-deficient narcolepsy: SNS sensitivity/specificity for narcolepsy diagnosis was 85%/92% (cutoff $< 0$ ) vs 100%/77% for UNS (cutoff $\geq 14$ ) and 81%/73% for ESS (cutoff $\geq 14$ ); sensitivity/specificity for identification of hypocretin-1-deficient patients was 93%/92% for SNS vs 100%/77% for UNS and 92%/73% for ESS. |

|            |                                          |     |                                                                                                                                                                                                                                                           |                                                                                                                                                                                                                                                                                                                                                                                                                                                                                                                                                                        |
|------------|------------------------------------------|-----|-----------------------------------------------------------------------------------------------------------------------------------------------------------------------------------------------------------------------------------------------------------|------------------------------------------------------------------------------------------------------------------------------------------------------------------------------------------------------------------------------------------------------------------------------------------------------------------------------------------------------------------------------------------------------------------------------------------------------------------------------------------------------------------------------------------------------------------------|
|            | Sturzenegger C et al, 2014 <sup>48</sup> | 207 | 85 patients with NC, 122 with ES of other origins (e.g., IH, SDB); mean/median age, sex percentages NR                                                                                                                                                    | To compare SNS sensitivity/specificity with that of UNS and ESS to diagnose narcolepsy and identify hypocretin-1-deficient narcolepsy: SNS sensitivity/specificity for narcolepsy diagnosis was 86%/89% (cutoff <0) vs 100%/62% for UNS (cutoff ≥14), and 91%/54% for ESS (cutoff ≥14); for identification of hypocretin-1-deficient narcolepsy, sensitivity/specificity was 92%/89% for SNS vs 100%/62% for UNS and 93%/54% for ESS                                                                                                                                   |
| <b>SSI</b> | Anic-Labat, 1999 <sup>26</sup>           | 983 | 63 patients with clear-cut NC and 920 with other sleep disorders entering the Stanford Sleep Disorder Clinic; mean (±SD) age: 46.2 (2.1); 56% women                                                                                                       | To validate the SSI section focused on cataplexy for diagnosis of cataplexy: ROC analysis showed that occurrence of cataplexy (i.e., muscle weakness) triggered by hearing and telling a joke (risk = 73.3% “yes” vs 1.7% “no”) and anger (risk = 91.7% “yes” vs 45.8% “no”) were the most important predictive factors for diagnosis of cataplexy and differentiation from other sleep disorders; laughter was the second most useful discriminator if patients denied hearing or telling a joke as a trigger of cataplexy symptoms (risk = 32.5% “yes” vs 0.6% “no”) |
| <b>UNS</b> | Hublin C et al, 1994 <sup>44</sup>       | 488 | 24 patients with NC, compared with 7 disease groups: OSA (n=29); multiple sclerosis (n=25); depression (n=79); epilepsy (n=116); sciatica (n=105); alcohol abuse (n=38); and neurovegetative symptoms (n=72); mean (range) age: 42.8 (17-71) y; 50% women | To validate the UNS for NC: the mean UNS score was 27.3 in patients with NC vs 9.6 in the OSA group and between 5 and 6 in the other comparison groups; sensitivity/specificity for NC was 98.8%/100% (cutoff ≥14)                                                                                                                                                                                                                                                                                                                                                     |

|  |                                   |     |                                                                                                                                      |                                                                                                                                                                                                                                                                                                                                                                                                                                                                                                                                                                               |
|--|-----------------------------------|-----|--------------------------------------------------------------------------------------------------------------------------------------|-------------------------------------------------------------------------------------------------------------------------------------------------------------------------------------------------------------------------------------------------------------------------------------------------------------------------------------------------------------------------------------------------------------------------------------------------------------------------------------------------------------------------------------------------------------------------------|
|  | Wing YK et al, 2000 <sup>45</sup> | 234 | 17 patients with narcolepsy, 196 with various other sleep disorders, and 21 controls; mean ( $\pm$ SD) age 38.0 (17.5) y; 64.7% male | To validate the Chinese version of the UNS (CUNS) for narcolepsy: Mean ( $\pm$ SD) CUNS scores were significantly higher in patients with narcolepsy vs all other groups (18.6 [4.7]; 95% CI: 16.2-21.0) and well differentiated vs the other groups (F[6,227]=28.4; $P < 0.001$ ); Cronbach's alpha (internal consistency) was a satisfactory 0.75; items of sleepiness and cataplexy accounted for 45.5% of total variance; sensitivity/ specificity was 94.1%/93.5% (cutoff 13/14), with PPV of 53.3 and NPV of 99.5; the AUC of ROC analysis was 0.97 (95% CI: 0.95-0.99) |
|--|-----------------------------------|-----|--------------------------------------------------------------------------------------------------------------------------------------|-------------------------------------------------------------------------------------------------------------------------------------------------------------------------------------------------------------------------------------------------------------------------------------------------------------------------------------------------------------------------------------------------------------------------------------------------------------------------------------------------------------------------------------------------------------------------------|

<sup>a</sup>Reference numbers relate to full article; <sup>b</sup>All mean/median ages (ranges; SD) and sex percentages given are for participants with narcolepsy; <sup>c</sup>A representative sample/summary of data (all individual studies are too numerous to list); <sup>d</sup>Not a validation study or review of validation studies.

AUC, area under the curve; CETQ, Cataplexy Emotional Trigger Questionnaire; CI, confidence interval; ESS, Epworth Sleepiness Scale; IH, idiopathic hypersomnia; MSLT, Multiple Sleep Latency Test; MWT, Maintenance of Wakefulness Test; NC, narcolepsy with cataplexy; NNH, non-narcoleptic hypersomnia; NpC, narcolepsy with possible cataplexy; NR, not reported; NSAQ, Narcolepsy Status Assessment Questionnaire; NSSQ, Narcolepsy Symptom Status Questionnaire; OSA, obstructive sleep apnea; ROC, receiver operating characteristic; SD, standard deviation; SDB, sleep disordered breathing; SNS, Swiss Narcolepsy Scale; SSI, Stanford Center for Narcolepsy Sleep Inventory; UNS, Ullanlinna Narcolepsy Scale.
